# Supplementary material for: Unraveling the conformational determinants of LARP7 and 7SK small nuclear RNA by theoretical approaches
Source: Royal Society of Chemistry journal article supplement (doi:10.1039/c6mb00252h), 2016-06-02
Supplement: c6mb00252h1.pdf [file c6mb00252h1.pdf]

## Supporting Materials

**Table S1.** The cosine contents of the eight PCs in RNA-bound and RNA-free system.

|                         | <b>PC1</b> | <b>PC2</b> | <b>PC3</b> | <b>PC4</b> | <b>PC5</b> | <b>PC6</b> | <b>PC7</b> | <b>PC8</b> |
|-------------------------|------------|------------|------------|------------|------------|------------|------------|------------|
| <b>RNA-bound system</b> | 0.3158     | 0.0355     | 0.0240     | 0.0435     | 0.0876     | 0.0014     | 0.0121     | 0.0344     |
| <b>RNA-free system</b>  | 0.2533     | 0.1847     | 0.0538     | 0.0779     | 0.0658     | 0.0008     | 0.0147     | 0.0010     |

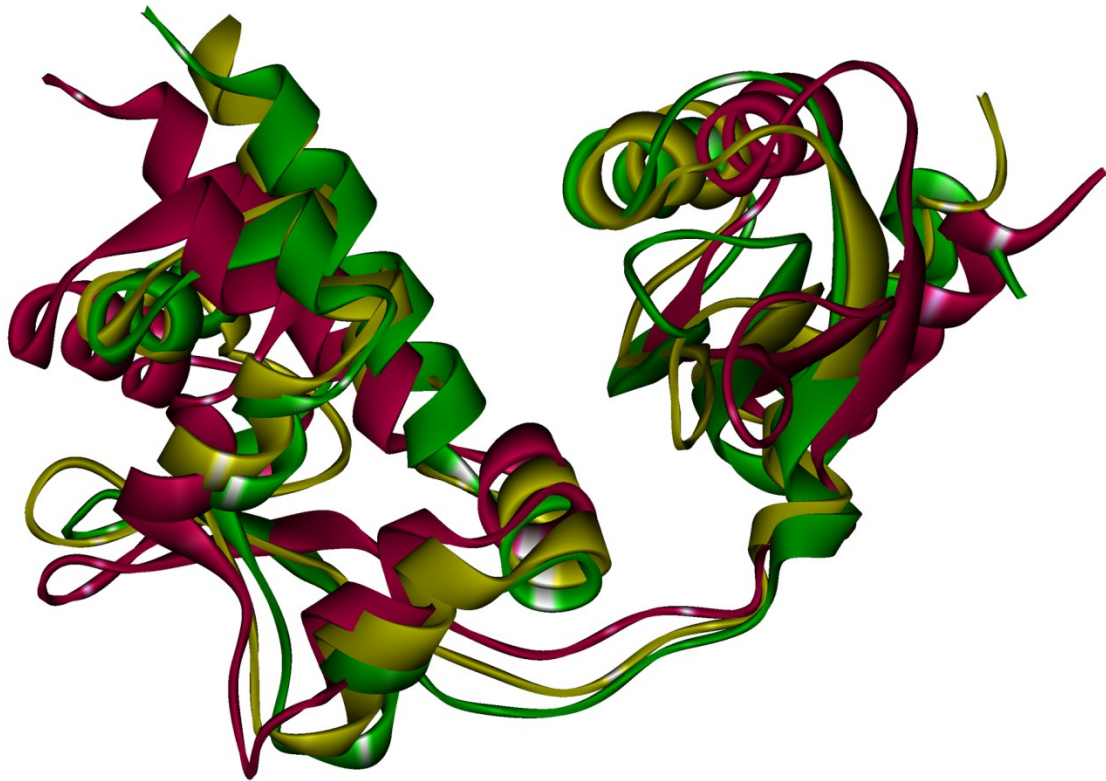

**Figure S1.** Comparison of the crystal structure and representative structure of RNA-bound and RNA-free system from the local minima in the FEL map. The ribbon of the crystal structure, the representative structure of RNA-bound and RNA-free system are colored in yellow, green and red respectively.

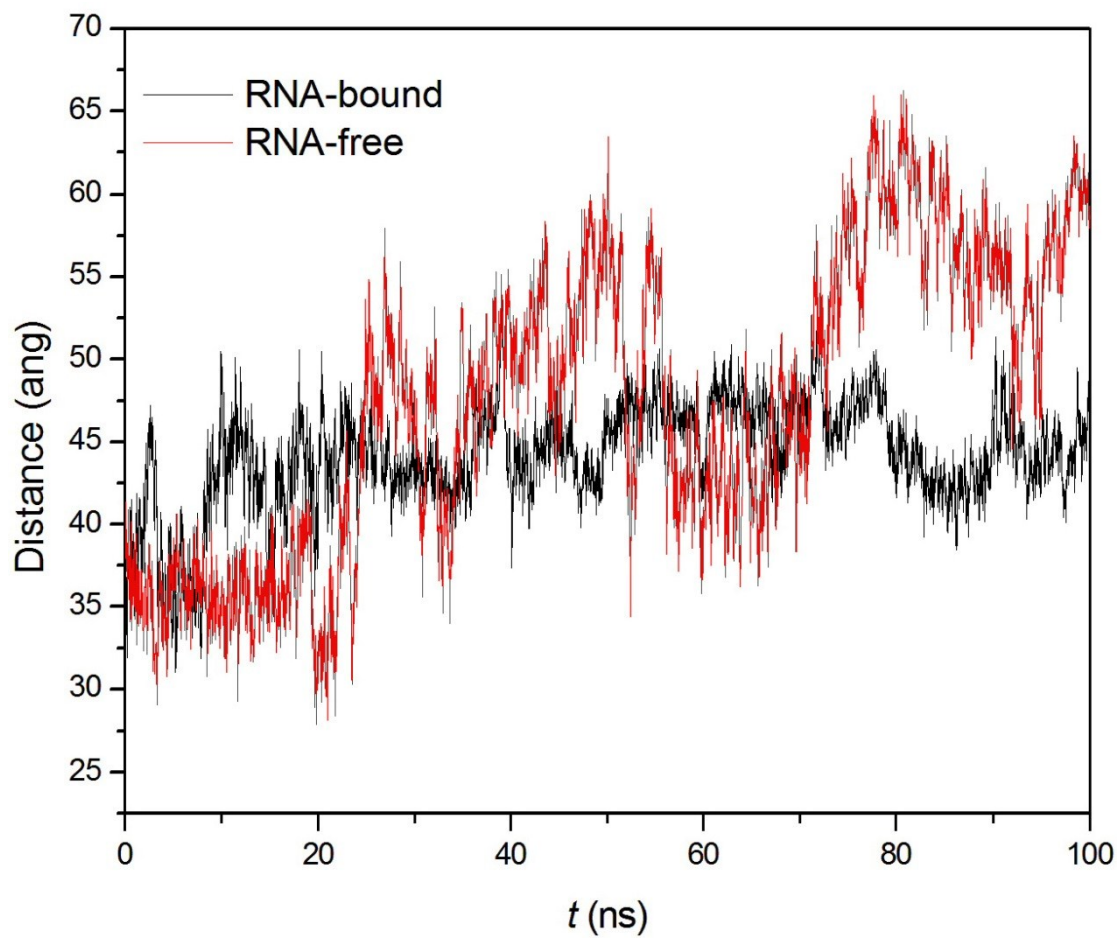

**Figure S2.** The distance between the geometric centers of Arg30 in the helix  $\alpha 1$  of LAM and Pro189 in the helix  $\alpha 2$  during the MD simulations.

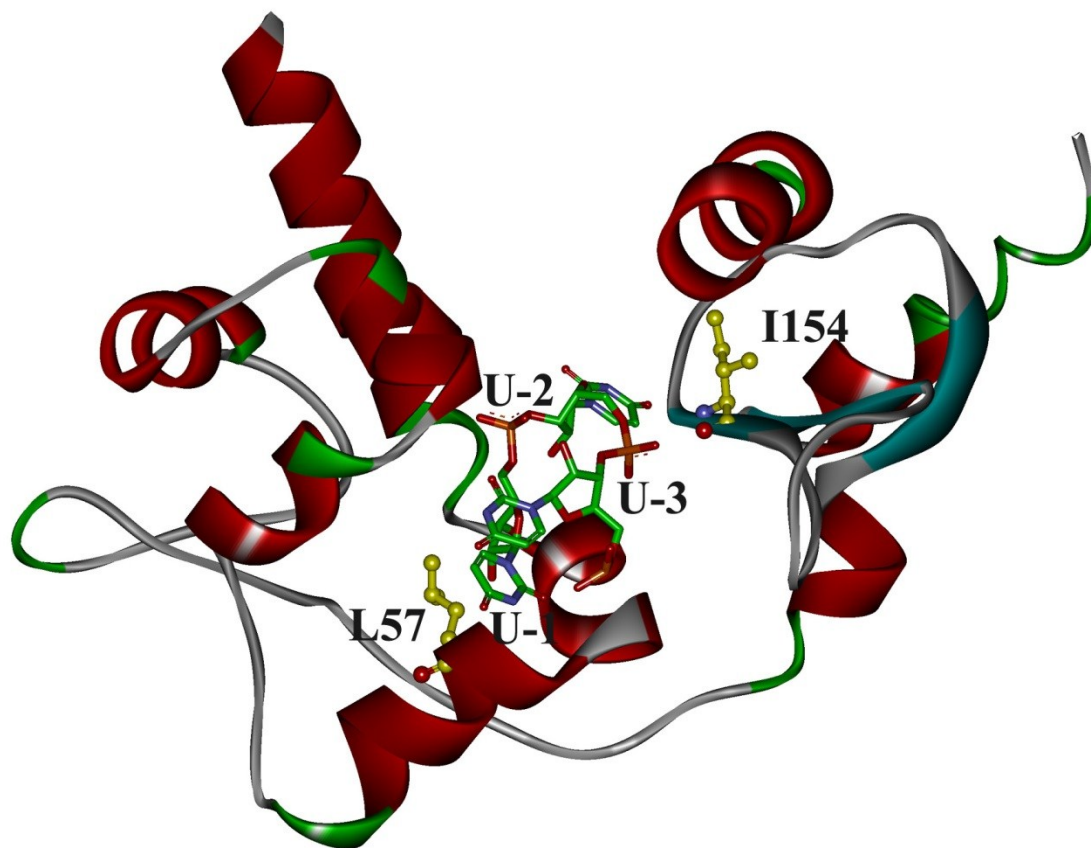

**Figure S3.** The binding interface of 3'-end of RNA 7SK with nonpolar residues Leu57 and Ile154 in the RNA-bound systems. Carbon atoms are colored in yellow and ribbon in red for LARP7, and carbon atoms are colored in green for RNA.
